# Supplementary material
Source: PubMed Central journal article supplement (PMC1359059)
Supplement: JCI0626679sd.pdf [file JCI0626679sd.pdf]

Table SD1. Patient characteristics<sup>a</sup>

| Patient | Sex | Age (year) | Esophageal Disease | Treatment | Maximum eosinophils /hpf | Cell thickness in basal layer | Maximum mast cells /hpf | Maximum lymphocytes /hpf | Genotype | Food anaphylaxis | SPT/A <sup>b</sup> | SPT/F <sup>b</sup> | RAST <sup>b</sup> (positive reaction) | Rhinitis <sup>c</sup> | Atopic dermatitis <sup>c</sup> | Asthma <sup>c</sup> | Alternative diagnosis     | Date <sup>d</sup> |
|---------|-----|------------|--------------------|-----------|--------------------------|-------------------------------|-------------------------|--------------------------|----------|------------------|--------------------|--------------------|---------------------------------------|-----------------------|--------------------------------|---------------------|---------------------------|-------------------|
| 1       | M   | 11         | NL                 | None      | 0                        | 3                             | 5                       | 3                        | Unk      | No               | ND                 | ND                 | ND                                    | Yes                   | No                             | No                  | Recurrent croup           | December          |
| 2       | M   | 11         | NL                 | LTRA      | 0                        | 3                             | 4                       | 3                        | Unk      | No               | ND                 | ND                 | ND                                    | No                    | No                             | Yes                 | Functional abdominal pain | May               |
| 3       | F   | 9          | NL                 | None      | 0                        | 3                             | 4                       | 3                        | Unk      | Unk              | ND                 | ND                 | ND                                    | Unk                   | Unk                            | Unk                 | Functional abdominal pain | March             |
| 4       | M   | 14         | NL                 | None      | 0                        | 2                             | 6                       | 4                        | Unk      | No               | ND                 | ND                 | ND                                    | No                    | No                             | No                  | Vomiting/diarrhea         | February          |
| 5       | F   | 7          | NL                 | LTRA      | 0                        | 3                             | 5                       | 6                        | Unk      | Yes              | 1                  | 3                  | ND                                    | Unk                   | Unk                            | Yes                 | Functional abdominal pain | March             |
| 6       | F   | 13         | NL                 | None      | 0                        | 2                             | 4                       | 2                        | Unk      | No               | 0                  | 4                  | ND                                    | No                    | No                             | No                  | Functional abdominal pain | August            |
| 7       | M   | 17         | CE                 | PPI       | 0                        | 4                             | 7                       | 12                       | Unk      | Yes              | 17                 | 4                  | ND                                    | No                    | No                             | Yes                 | None                      | November          |
| 8       | M   | 6          | CE                 | PPI       | 0                        | 4                             | 6                       | 10                       | Unk      | Unk              | ND                 | ND                 | ND                                    | Unk                   | Unk                            | Unk                 | None                      | June              |
| 9       | F   | 16         | CE                 | LTRA      | 3                        | 4                             | 6                       | 8                        | Unk      | No               | ND                 | ND                 | ND                                    | No                    | No                             | Yes                 | None                      | January           |
| 10      | F   | 13         | CE                 | LTRA+PPI  | 3                        | 5                             | 4                       | 8                        | Unk      | No               | 0                  | 0                  | ND                                    | No                    | No                             | No                  | None                      | August            |
| 11      | F   | 11         | CE                 | LTRA+PPI  | 6                        | 4                             | 6                       | 9                        | Unk      | Unk              | ND                 | ND                 | ND                                    | Unk                   | Unk                            | Unk                 | None                      | May               |
| 12      | M   | 11         | EE                 | PPI       | 24                       | 6                             | 6                       | 12                       | TT       | No               | 2                  | 5                  | 3                                     | Yes                   | No                             | Yes                 | None                      | November          |
| 13      | F   | 4          | EE                 | PPI       | 25                       | 6                             | 15                      | 15                       | TT       | No               | 0                  | 0                  | ND                                    | No                    | No                             | No                  | None                      | November          |
| 14      | M   | 15         | EE                 | None      | 30                       | 6                             | 24                      | 6                        | TG       | Unk              | 1                  | 1                  | ND                                    | Unk                   | Unk                            | Yes                 | None                      | February          |
| 15      | M   | 15         | EE                 | None      | 31                       | 6                             | 15                      | 11                       | TT       | No               | 8                  | 2                  | ND                                    | Yes                   | No                             | Yes                 | None                      | March             |
| 16      | M   | 13         | EE                 | PPI       | 32                       | 6                             | 10                      | 25                       | TG       | No               | 0                  | 0                  | ND                                    | No                    | No                             | No                  | None                      | June              |
| 17      | M   | 6          | EE                 | PPI       | 40                       | 7                             | 10                      | 21                       | TT       | Yes              | 5                  | 3                  | 0                                     | Unk                   | Unk                            | No                  | None                      | November          |
| 18      | M   | 13         | EE                 | LTRA      | 42                       | 7                             | 10                      | 5                        | TT       | No               | 4                  | 5                  | 2                                     | Yes                   | Yes                            | Yes                 | None                      | November          |
| 19      | F   | 16         | EE                 | LTRA+PPI  | 50                       | 9                             | 9                       | 23                       | TT       | No               | 0                  | 0                  | ND                                    | No                    | No                             | No                  | None                      | December          |
| 20      | M   | 15         | EE                 | None      | 51                       | 7                             | 13                      | 22                       | TG       | No               | 0                  | 0                  | ND                                    | No                    | No                             | No                  | None                      | February          |
| 21      | M   | 3          | EE                 | PPI       | 56                       | 7                             | 15                      | 20                       | TG       | Yes              | 1                  | 12                 | 4                                     | No                    | No                             | No                  | None                      | August            |
| 22      | F   | 14         | EE                 | PPI       | 72                       | 8                             | 11                      | 12                       | TG       | No               | 8                  | 12                 | ND                                    | Yes                   | Yes                            | No                  | None                      | September         |
| 23      | M   | 2          | EE                 | None      | 83                       | 11                            | 31                      | 21                       | TG       | Yes              | 0                  | 12                 | 9                                     | No                    | No                             | No                  | None                      | May               |
| 24      | F   | 4          | EE                 | PPI       | 218                      | 8                             | 11                      | 28                       | TT       | No               | 2                  | 4                  | 5                                     | Yes                   | No                             | No                  | None                      | November          |

  

| Patient | Sex | Age (year) | Esophageal Disease | Treatment | Maximum eosinophils/h pf | Hyperplasia | SPT/A | SPT/F | Allergic Diseases | Genotype |
|---------|-----|------------|--------------------|-----------|--------------------------|-------------|-------|-------|-------------------|----------|
| 25      | M   | 7          | CE                 | None      | 0                        | Yes         | 2     | 4     | Yes               | Unk      |
| 26      | M   | 11         | CE                 | PPI       | 0                        | Yes         | Unk   | Unk   | Yes               | Unk      |
| 27      | M   | 7          | CE                 | None      | 0                        | Yes         | Unk   | Unk   | Unk               | Unk      |
| 28      | F   | 9          | CE                 | pentasa   | 1                        | No          | 1     | 1     | Yes               | Unk      |
| 29      | M   | 16         | CE                 | None      | 5                        | Yes         | Unk   | Unk   | Unk               | Unk      |
| 30      | F   | 4          | CE                 | None      | 6                        | Yes         | Unk   | 4     | Yes               | Unk      |
| 31      | M   | 6          | EE                 | PPI+LTRA  | 26                       | Yes         | 2     | 8     | Yes               | TG       |
| 32      | M   | 12         | EE                 | None      | 30                       | Yes         | Unk   | Unk   | Unk               | TG       |
| 33      | M   | 15         | EE                 | None      | 39                       | Yes         | 4     | 0     | Yes               | TG       |
| 34      | M   | 8          | EE                 | None      | 48                       | Yes         | Unk   | 2     | Yes               | Unk      |
| 35      | F   | 12         | EE                 | PPI       | 55                       | Yes         | 0     | 0     | Yes               | TT       |
| 36      | M   | 3          | EE                 | None      | 79                       | Yes         | 0     | 6     | Yes               | TT       |
| 37      | M   | 17         | EE                 | None      | 126                      | Yes         | Unk   | Unk   | Unk               | Unk      |

<sup>a</sup>Patient characteristics at the time the biopsy sample was obtained.

<sup>b</sup>The number of positive skin prick tests to aeroallergens (SPT/A) or foods (SPT/F) or positive food RAST results are reported as described in the Methods.

<sup>c</sup>History of past or present atopic dermatitis, allergic rhinitis or asthma.

<sup>d</sup>Month when the biopsy was collected

Abbreviations: M, Male; F, Female; NL, Normal; CE, Chronic Esophagitis; EE, Eosinophilic Esophagitis; LTRA, Leukotriene Receptor Antagonist; PPI, Proton Pump Inhibitor; ND, Not Determined; Unk, Unknown.

Table SD2. Number of genes obtained using Welch and Student T-Test, Pearson correlation test and fold change filter.<sup>a</sup>

| <b>Comparison</b> | <b>fold change</b> |          |          |           |
|-------------------|--------------------|----------|----------|-----------|
|                   | <b>2</b>           | <b>3</b> | <b>5</b> | <b>10</b> |
| NL vs EE          | 1146               | 382      | 124      | <b>42</b> |
| NL vs CE          | 25                 | 7        | 0        | 0         |

  

|                                               | <b>p value</b> |             |              |              |
|-----------------------------------------------|----------------|-------------|--------------|--------------|
|                                               | <b>0.05</b>    | <b>0.01</b> | <b>0.005</b> | <b>0.001</b> |
| <b>NL vs EE</b>                               |                |             |              |              |
| Welch T test                                  | 9063           | 4183        | 3034         | 1527         |
| student T test                                | 7707           | 3283        | 2295         | 1017         |
| Welch T test + FDR <sup>b</sup>               | 1928           | <b>574</b>  | 333          | 69           |
| student T test +FDR                           | 958            | 236         | 134          | 59           |
| <b>NL vs CE</b>                               |                |             |              |              |
| Welch T test                                  | 1432           | <b>163</b>  | 73           | 8            |
| student T test                                | 1618           | <b>216</b>  | 105          | 8            |
| Welch T test + FDR                            | 0              | 0           | 0            | 0            |
| student T test + FRD                          | 0              | 0           | 0            | 0            |
| <b>EE Atopic vs EE non-Atopic</b>             |                |             |              |              |
| Welch T test                                  | <b>1403</b>    | 200         | 90           | 13           |
| student T test                                | <b>1543</b>    | 216         | 88           | 14           |
| Welch T test + FDR                            | 0              | 0           | 0            | 0            |
| student T test + FDR                          | 0              | 0           | 0            | 0            |
| <b>EE female vs EE male</b>                   |                |             |              |              |
| Welch T test                                  | 4158           | 857         | <b>434</b>   | 75           |
| student T test                                | 4185           | 691         | 298          | 49           |
| Welch T test + FDR                            | 1              | 1           | 1            | 1            |
| student T test + FDR                          | 8              | 5           | 5            | 5            |
| <b>EE treated vs EE untreated<sup>c</sup></b> |                |             |              |              |
| Welch T test                                  | 6487           | 1824        | 1022         | 275          |
| student T test                                | 5968           | 1785        | 984          | 141          |
| Welch T test + FDR                            | 0              | 0           | 0            | 0            |
| student T test + FDR                          | 0              | 0           | 0            | 0            |

  

| <b>Pearson correlation</b>        | <b>p value</b> |             |              |              |               |
|-----------------------------------|----------------|-------------|--------------|--------------|---------------|
|                                   | <b>0.05</b>    | <b>0.01</b> | <b>0.005</b> | <b>0.001</b> | <b>0.0005</b> |
| <b>Correlation to eosinophils</b> | 6261           | 2757        | <b>1943</b>  | 899          | 615           |
| <b>Correlation to age</b>         | 2257           | <b>334</b>  | 136          | 16           | 10            |

<sup>a</sup> The values in bold have been used in this study.

<sup>b</sup> The FDR used was always Benjamini and Hochberg false discovery rate correction

Abbreviation: False rate discovery correction (FDR); EE, Eosinophilic esophagitis; CE, Chronic esophagitis; NL, normal.

<sup>c</sup> The patients treated with PPI and/or LTRA+PPI has been compared to the untreated EE patients

Table SD3. Gene ontology of the upregulated genes in the EE transcript signature.<sup>a</sup>

| <b>Classification</b>                                         | <b>COUNT</b> | <b>%</b> | <b>PVALUE</b> |
|---------------------------------------------------------------|--------------|----------|---------------|
| <b>Total upregulated</b>                                      | 344          |          |               |
| <b>CLASSIFIED (biological process)</b>                        | 270          | 100      |               |
| RESPONSE TO PEST/PATHOGEN/PARASITE                            | 26           | 9.6      | 2.7E-09       |
| RESPONSE TO STRESS                                            | 30           | 11.1     | 1.2E-06       |
| INFLAMMATORY RESPONSE                                         | 13           | 4.8      | 6.2E-06       |
| POSITIVE REGULATION OF I-KAPPAB KINASE/NF-KAPPAB CASCADE      | 8            | 3        | 6.6E-05       |
| RESPONSE TO WOUNDING                                          | 14           | 5.2      | 6.8E-05       |
| POSITIVE REGULATION OF SIGNAL TRANSDUCTION                    | 8            | 3        | 9.7E-05       |
| CELL COMMUNICATION                                            | 70           | 25.8     | 1.2E-04       |
| SIGNAL TRANSDUCTION                                           | 59           | 21.8     | 1.8E-04       |
| RESPONSE TO BIOTIC STIMULUS                                   | 49           | 18.1     | 3.0E-04       |
| PROTEIN KINASE CASCADE                                        | 12           | 4.4      | 3.3E-04       |
| HUMORAL IMMUNE RESPONSE                                       | 9            | 3.3      | 1.1E-03       |
| IMMUNE RESPONSE                                               | 44           | 16.2     | 1.4E-03       |
| RESPONSE TO EXTERNAL STIMULUS                                 | 54           | 19.9     | 3.0E-03       |
| APOPTOSIS                                                     | 14           | 5.2      | 3.7E-03       |
| CARBOXYLIC ACID BIOSYNTHESIS                                  | 5            | 1.8      | 4.2E-03       |
| ORGANIC ACID BIOSYNTHESIS                                     | 5            | 1.8      | 4.2E-03       |
| PROTEOLYSIS AND PEPTIDOLYSIS                                  | 17           | 6.3      | 6.9E-03       |
| ICOSANOID METABOLISM                                          | 4            | 1.5      | 7.2E-03       |
| MONOCARBOXYLIC ACID TRANSPORT                                 | 3            | 1.1      | 7.9E-03       |
| CATABOLISM                                                    | 22           | 8.1      | 9.0E-03       |
| PROTEIN CATABOLISM                                            | 17           | 6.3      | 9.3E-03       |
| COMPLEMENT ACTIVATION                                         | 4            | 1.5      | 1.1E-02       |
| CELL ADHESION                                                 | 17           | 6.3      | 1.1E-02       |
| ANTIGEN PROCESSING, ENDOGENOUS ANTIGEN VIA MHC CLASS I        | 3            | 1.1      | 1.5E-02       |
| MACROMOLECULE CATABOLISM                                      | 18           | 6.6      | 1.6E-02       |
| FATTY ACID BIOSYNTHESIS                                       | 4            | 1.5      | 1.6E-02       |
| ICOSANOID BIOSYNTHESIS                                        | 3            | 1.1      | 2.5E-02       |
| FATTY ACID METABOLISM                                         | 6            | 2.2      | 2.8E-02       |
| BLOOD COAGULATION                                             | 5            | 1.8      | 2.9E-02       |
| HEMOSTASIS                                                    | 5            | 1.8      | 3.6E-02       |
| CHOLESTEROL METABOLISM                                        | 4            | 1.5      | 4.0E-02       |
| LIPID METABOLISM                                              | 13           | 4.8      | 4.6E-02       |
| ANION TRANSPORT                                               | 7            | 2.6      | 4.7E-02       |
| STEROL METABOLISM                                             | 4            | 1.5      | 4.9E-02       |
| REGULATION OF BODY FLUIDS                                     | 5            | 1.8      | 5.0E-02       |
| <b>CLASSIFIED (molecular function)</b>                        | 271          | 100      |               |
| SIGNAL TRANSDUCER ACTIVITY                                    | 60           | 22.1     | 2.5E-04       |
| SCAVENGER RECEPTOR ACTIVITY                                   | 5            | 1.8      | 4.5E-04       |
| OXIDOREDUCTASE ACTIVITY, ACTING ON THE CH-NH2 GROUP OF DONORS | 4            | 1.5      | 1.7E-03       |
| PEPTIDE TRANSPORTER ACTIVITY                                  | 3            | 1.1      | 2.4E-03       |
| PROTEIN BINDING                                               | 37           | 13.7     | 3.8E-03       |
| PEPTIDASE ACTIVITY                                            | 16           | 5.9      | 5.1E-03       |
| ENDOPEPTIDASE ACTIVITY                                        | 13           | 4.8      | 5.1E-03       |
| CHYMOTRYPSIN ACTIVITY                                         | 6            | 2.2      | 1.0E-02       |
| OBSOLETE MOLECULAR FUNCTION                                   | 15           | 5.5      | 1.2E-02       |
| TRYPSIN ACTIVITY                                              | 6            | 2.2      | 2.6E-02       |
| PROTEASOME ENDOPEPTIDASE ACTIVITY                             | 3            | 1.1      | 3.1E-02       |
| GLYCOSAMINOGLYCAN BINDING                                     | 5            | 1.8      | 3.3E-02       |
| INTERLEUKIN RECEPTOR ACTIVITY                                 | 3            | 1.1      | 4.0E-02       |
| RECEPTOR ACTIVITY                                             | 38           | 14       | 4.2E-02       |
| INTERLEUKIN BINDING                                           | 3            | 1.1      | 4.3E-02       |
| ENZYME ACTIVATOR ACTIVITY                                     | 6            | 2.2      | 4.3E-02       |
| OLIGOPEPTIDE TRANSPORTER ACTIVITY                             | 2            | 0.7      | 4.3E-02       |

<sup>a</sup>The functional annotations are generated by subjecting the data to DAVID software with the GoCharts (gene ontology charts) functional algorithm. Analysis is based on biological processes and molecular functions.

Table SD4. Gene ontology of the downregulated genes in the EE transcript signature<sup>a</sup>

| <b>Classification</b>                                    | <b>COUNT</b> | <b>%</b> | <b>PVALUE</b> |
|----------------------------------------------------------|--------------|----------|---------------|
| <b>Total downregulated</b>                               | 230          |          |               |
| <b>CLASSIFIED (biological process)</b>                   | 180          | 100      |               |
| CARBOXYLIC ACID METABOLISM                               | 11           | 6.1      | 1.1E-03       |
| ORGANIC ACID METABOLISM                                  | 11           | 6.1      | 1.2E-03       |
| METABOLISM                                               | 75           | 41.7     | 6.5E-03       |
| INTRACELLULAR SIGNALING CASCADE                          | 16           | 8.9      | 1.6E-02       |
| FATTY ACID METABOLISM                                    | 5            | 2.8      | 2.2E-02       |
| ICOSANOID METABOLISM                                     | 3            | 1.7      | 2.5E-02       |
| MORPHOGENESIS                                            | 16           | 8.9      | 3.7E-02       |
| PROTEIN KINASE CASCADE                                   | 6            | 3.3      | 4.7E-02       |
| <b>CLASSIFIED (molecular function)</b>                   | 180          | 100      |               |
| CATALYTIC ACTIVITY                                       | 63           | 35       | 3.1E-04       |
| OXIDOREDUCTASE ACTIVITY, ACTING ON CH-OH GROUP OF DONORS | 6            | 3.3      | 1.8E-03       |
| ENZYME INHIBITOR ACTIVITY                                | 8            | 4.4      | 2.5E-03       |
| SERINE ESTERASE ACTIVITY                                 | 3            | 1.7      | 5.9E-03       |
| ACTIN BINDING                                            | 7            | 3.9      | 6.0E-03       |
| OXIDOREDUCTASE ACTIVITY                                  | 16           | 8.9      | 6.8E-03       |
| CARBOXYLESTERASE ACTIVITY                                | 3            | 1.7      | 8.3E-03       |
| ENZYME REGULATOR ACTIVITY                                | 11           | 6.1      | 8.3E-03       |
| CYTOSKELETAL PROTEIN BINDING                             | 7            | 3.9      | 2.5E-02       |
| TRANS-1,2-DIHYDROBENZENE-1,2-DIOL DEHYDROGENASE ACTIVITY | 2            | 1.1      | 2.9E-02       |
| HYDROLASE ACTIVITY, ACTING ON ESTER BONDS                | 11           | 6.1      | 3.0E-02       |
| ENDOPEPTIDASE INHIBITOR ACTIVITY                         | 5            | 2.8      | 3.1E-02       |
| PROTEASE INHIBITOR ACTIVITY                              | 5            | 2.8      | 3.1E-02       |
| CARBOXYLIC ACID TRANSPORTER ACTIVITY                     | 4            | 2.2      | 3.4E-02       |
| ORGANIC ACID TRANSPORTER ACTIVITY                        | 4            | 2.2      | 3.4E-02       |
| CYTOCHROME-B5 REDUCTASE ACTIVITY                         | 2            | 1.1      | 3.6E-02       |
| POLY(A) BINDING                                          | 2            | 1.1      | 3.6E-02       |
| PHOSPHORIC MONOESTER HYDROLASE ACTIVITY                  | 6            | 3.3      | 3.6E-02       |
| PHOSPHOPROTEIN PHOSPHATASE ACTIVITY                      | 5            | 2.8      | 4.1E-02       |
| MAGNESIUM ION BINDING                                    | 5            | 2.8      | 4.3E-02       |

<sup>a</sup>The functional annotations are generated by subjecting the data to DAVID software with the GoCharts (gene ontology charts) functional algorithm. Analysis is based on biological processes and molecular functions.

Table SD5. EE transcript Signature

Cytokines, cytokine receptors and cytokine signaling  
Mast cell genes  
Arachidonic acid metabolism and relatives  
Cell growth and differentiation

| Affy-ID     | Fold Increase | Name                       | Complete name of the genes                                                                                                                                                                                | GeneBank  |
|-------------|---------------|----------------------------|-----------------------------------------------------------------------------------------------------------------------------------------------------------------------------------------------------------|-----------|
| 223210 at   | 53.17         | CCL26                      | [[MIP-4alpha][CCL26][TSC-1][SCYA26, FORMERLY][eotaxin-3 precursor][EOTAXIN 3][CC chemokine [MIP-4][thymic stroma chemokine-1][macrophage inflammatory protein 4-2]]                                       | NM_006072 |
| 210809 s at | 46.29         | POSTN                      | [[OSF-2][POSTN][PNI][periostin, osteoblast specific factor][osteoblast specific factor 2 (fasciclin I-like)]]                                                                                             | NM_006475 |
| 206026 s at | 23.59         | TNFAIP6                    | [[TSG6][TNFAIP6][hyaluronate-binding protein][tumor necrosis factor-stimulated gene-6 protein][TUMOR NECROSIS FACTOR-ALPHA-INDUCED PROTEIN 6][tumor necrosis factor-stimulated gene-6 protein]]           | NM_007115 |
| 233663 s at | 23.42         | CDH26                      | [[CDH26][cadherin-like 26]]                                                                                                                                                                               | NM_177980 |
| 232306 at   | 21            | CDH26                      | [[CDH26][cadherin-like 26]]                                                                                                                                                                               | NM_177980 |
| 207328 at   | 20.89         | ALOX15                     | [[1.13.11.33][ALOX15][arachidonate 15-lipoxygenase][15-LIPOXYGENASE, RETICULOCYTE ARACHIDONATE]]                                                                                                          | NM_001140 |
| 206942 s at | 19.81         | PMCH                       | [[PMCH][pro-melanin-concentrating hormone]]                                                                                                                                                               | NM_002674 |
| 204470 at   | 18.79         | CXCL1                      | [[MGSA-a][ANAP-3][CXCL1][SCYB1][GROa][GRO1, FORMERLY][GRO PROTEIN, ALPHA][GRO1 ONCOGENE, FORMERLY][MELANOMA GROWTH STIMULATORY ACTIVITY, ALPHA]]                                                          | NM_001511 |
| 214677 x at | 17.57         | IGLV@                      | [[IGLJ3][immunoglobulin lambda joining 3]]                                                                                                                                                                | NM_005174 |
| 211430 s at | 16.42         | IGHD                       | [[IGHM][immunoglobulin mu][IMMUNOGLOBULIN HEAVY MU CHAIN][immunoglobulin heavy constant mu][constant region of heavy chain of IgM]]                                                                       | AK90461   |
| 243585 at   | 15            | FLJ16025                   | [[FLJ16025]]                                                                                                                                                                                              | XM_293626 |
| 205890 s at | 14.85         | UBD                        | [[UBD][FAT10][diubiquitin][ubiquitin D1]]                                                                                                                                                                 | NM_006398 |
| 212592 at   | 14.61         | IGJ                        | [[IGCJ1][CHI][IGJ][immunoglobulin J chain][immunoglobulin J polypeptide, linker protein for immunoglobulin alpha and mu polypeptides]]                                                                    | NM_144646 |
| 238429 at   | 14.01         | FLJ33069                   | [[FLJ33069][hypothetical protein FLJ33069]]                                                                                                                                                               | NM_144649 |
| 205624 at   | 13.13         | CPA3                       | [[CPA3][13.4.17.1][carboxypeptidase A3 (mast cell)][CARBOXYPEPTIDASE A3, MAST CELL][mast cell carboxypeptidase A3 precursor]]                                                                             | NM_001870 |
| 206207 at   | 12.69         | CLC                        | [[LPL, HUMAN][CLC1][galactin-10][1.3.1.5][GALS10][GALECTIN 10][lysocitichin acylhydrolase][eosinophil lysophospholipase][LYSOPHOSPHOLIPASE OF EOSINOPHIL][Charot]]                                        | NM_001828 |
| 224795 x at | 12.64         | TCF12; HEB; HTF4; HsT17266 | [[IGKC]]                                                                                                                                                                                                  | BX647333  |
| 209138 x at | 12.4          | IGL@                       | [[IGL]]                                                                                                                                                                                                   | NG_000002 |
| 225688 s at | 12.05         | PHLDB2                     | [[PHLDB2][pleckstrin homology-like domain, family B, member 2]]                                                                                                                                           | NM_145753 |
| 1555778_a_a | 11.84         | POSTN                      | [[OSF-2][POSTN][PNI][periostin, osteoblast specific factor][osteoblast specific factor 2 (fasciclin I-like)]]                                                                                             | NM_006475 |
| 221671 x at | 10.97         | TCF12; HEB; HTF4; HsT17266 | [[IGKC]]                                                                                                                                                                                                  | BX647333  |
| 220622 at   | 10.94         | FLJ23259                   | [[FLJ23259][hypothetical protein FLJ23259]]                                                                                                                                                               | NM_024727 |
| 221651 x at | 10.2          | TCF12; HEB; HTF4; HsT17266 | [[IGKC]]                                                                                                                                                                                                  | BX647333  |
| 232165 at   | 10.12         | EPPK1                      | [[EPPK1][EPPK1][lepiplakin 1][450 kDa epidermal antigen]]                                                                                                                                                 | NM_031308 |
| 242013 at   | 9.701         | na                         | [[na][hypothetical LOC148280 (LOC148280), mRNA]]                                                                                                                                                          | XM_097433 |
| 206529 x at | 9.548         | SLC26A4                    | [[SLC26A4][pendrin][PDS1][DFNB4][solute carrier family 26, member 4]]                                                                                                                                     | NM_000441 |
| 232164 s at | 9.334         | EPPK1                      | [[EPPK1][EPPK1][lepiplakin 1][450 kDa epidermal antigen]]                                                                                                                                                 | NM_031308 |
| 225647 s at | 9.008         | CTSC                       | [[HMS1][CPPI13.4.14.1][DPP1][PALS1][DPP1][CTSC][PLS1][dipeptidyl transferase][cathepsin C][dipeptidyl-peptidase III][cathepsin J][Papillon-Lefevre syndrome][DIPPTIDYL PEP]]                              | NM_001814 |
| 220330 s at | 8.687         | SAMSN1                     | [[HACS1][SAMS1][HEMATOPOIETIC ADAPTOR CONTAINING SH3 AND SAM DOMAINS 1][SAM domain, SH3 domain and nuclear localisation signals, 1][SAM DOMAIN, SH3 DOMAIN]]                                              | NM_022136 |
| 224412 s at | 8.519         | TRPM6                      | [[CHAK2][TRPM6][CHANNEL KINASE 2][transient receptor potential cation channel, subfamily M, member 6]]                                                                                                    | NM_017662 |
| 215121 x at | 8.317         | IGLV@                      | [[IGL]]                                                                                                                                                                                                   | AK051714  |
| 225458 at   | 8.068         | SEC6L1                     | [[SEC6L1][SEC6-like 1 (S. cerevisiae)]]                                                                                                                                                                   | NM_007277 |
| 223423 at   | 8.008         | GPR160                     | [[GPR160][GPR160][putative G protein-coupled receptor][G protein-coupled receptor 160]]                                                                                                                   | NM_014373 |
| 227480 at   | 8.003         | SUSD2                      | [[SUSD2][sushi domain containing 2]]                                                                                                                                                                      | NM_019601 |
| 236979 at   | 7.996         | KIAA0495                   | [[KIAA0495]]                                                                                                                                                                                              | AB007964  |
| 221796 at   | 7.355         | NTRK2                      | [[NTRK2][NTRK2][TYROSINE KINASE RECEPTOR B][neurotrophic tyrosine kinase, receptor, type 2]]                                                                                                              | NM_006180 |
| 225646 at   | 7.262         | CTSC                       | [[HMS1][CPPI13.4.14.1][DPP1][PALS1][DPP1][CTSC][PLS1][dipeptidyl transferase][cathepsin C][dipeptidyl-peptidase III][cathepsin J][Papillon-Lefevre syndrome][DIPPTIDYL PEP]]                              | NM_001814 |
| 215379 x at | 7.045         | IGLV@                      | [[IGLJ3][immunoglobulin lambda joining 3]]                                                                                                                                                                | AK051714  |
| 235229 at   | 6.874         | KIR216                     | [[KIR216][similar to Olfactory receptor 212 (LOC346170), mRNA]]                                                                                                                                           | XM_294092 |
| 206765 at   | 6.696         | KCNJ2                      | [[KCNJ2][inward rectifier channel 2][inward rectifier K+ channel KIR2.1][cardiac inward rectifier potassium channel][inward rectifier potassium channel 2]]                                               | NM_000891 |
| 221795 at   | 6.56          | NTRK2                      | [[NTRK2][NTRK2][TYROSINE KINASE RECEPTOR B][neurotrophic tyrosine kinase, receptor, type 2]]                                                                                                              | NM_006180 |
| 216474 x at | 6.429         | TPSB2                      | [[TPSB2][trypsinase, alpha]]                                                                                                                                                                              | NM_003294 |
| 201487 at   | 6.299         | CTSC                       | [[HMS1][CPPI13.4.14.1][DPP1][PALS1][DPP1][CTSC][PLS1][dipeptidyl transferase][cathepsin C][dipeptidyl-peptidase III][cathepsin J][Papillon-Lefevre syndrome][DIPPTIDYL PEP]]                              | NM_001814 |
| 219684 at   | 6.278         | IFRG28                     | [[IFRG28][interferon responsive protein]]                                                                                                                                                                 | NM_022147 |
| 205579 at   | 6.191         | HRH1                       | [[HRH1][H1-1][hish1][histamine receptor H1][BPHS, MOUSE, HOMOLOG OF][histamine receptor, subclass H1]]                                                                                                    | NM_000861 |
| 219197 s at | 6.166         | SCUBE2                     | [[SCUBE2][signal peptide, CUB domain, EGF-like 2]]                                                                                                                                                        | NM_020974 |
| 214669 x at | 6.073         | IGKC                       | [[Kml][HCAK1][IGKC1][immunoglobulin kappa constant][IMMUNOGLOBULIN IN V KAPPA-CHAIN DEFICIENCY][IMMUNOGLOBULIN KAPPA LIGHT CHAIN][immunoglobulin kappa constant]]                                         | BM993907  |
| 207134 x at | 6.028         | TPSB2                      | [[TPSB2][trypsinase, alpha]]                                                                                                                                                                              | NM_003294 |
| 204591 at   | 5.928         | CHL1                       | [[CHL1][CAM2][CHL1][CALL][neural cell adhesion molecule][cell adhesion molecule L1-like][CHL1, MOUSE, HOMOLOG OF][L1 cell adhesion molecule 2][cell adhesion molecule with fibronectin type III repeats]] | NM_006614 |
| 203854 at   | 5.687         | IF                         | [[IF][3.4.21.45][IF][IFACTOR 1][FACTOR 'EYE'][COMPLEMENT COMPONENT 1][factor (complement)]][C3 INACTIVATOR, DEFICIENCY OF][C3b INACTIVATOR, COMPLEMENT COMPO]]                                            | NM_000204 |
| 204826 at   | 5.608         | GLDC                       | [[GLDC][HYGN1][GCSPI][GCEI][NKH1][1.4.4.2][GLYCINE CLEAVAGE SYSTEM P PROTEIN][glycine dehydrogenase (decarboxylating); glycine decarboxylase, glycine cleavage syste]]                                    | NM_000170 |
| 225457 s at | 5.608         | SEC6L1                     | [[SEC6L1][SEC6-like 1 (S. cerevisiae)]]                                                                                                                                                                   | NM_007277 |
| 205683 x at | 5.573         | TPSB2                      | [[TPSB2][trypsinase, alpha]]                                                                                                                                                                              | NM_003294 |
| 207717 s at | 5.342         | PKP2                       | [[PKP2][plakophilin 2]]                                                                                                                                                                                   | NM_004572 |
| 206726 at   | 5.265         | PGDS                       | [[PGDS][15.3.99.2][prostaglandin-D synthase][prostaglandin D2 synthase, hematopoietic][hematopoietic prostaglandin D2 synthase]]                                                                          | NM_014485 |
| 213258 at   | 5.108         | TFPI                       | [[LAC1][TFPI][EPI][EXTRINSIC PATHWAY INHIBITOR][tissue factor pathway inhibitor (lipoprotein-associated coagulation inhibitor)]]                                                                          | NM_006287 |
| 229975 at   | 5.094         |                            | [[Homo sapiens transcribed sequence with weak similarity to protein NP_060312.1]]                                                                                                                         | BQ004901  |
| 202357 s at | 5.073         | BF                         | [[GBG1][BF1][CAB1][PBF2][1.3.4.21.47][C3 proacelerator][glycine-rich beta-glycoprotein][B-factor, properdin][C3/C5 convertase][C3 proactivator][PROPERDIN FACTOR B][FACTO]]                               | NM_001710 |
| 221218 s at | 5.033         | TPK1                       | [[TPK1][TPK1][THIAMINE KINASE][thiamine pyrophosphokinase][mouse thiamine pyrophosphokinase homolog]]                                                                                                     | NM_022445 |
| 202234 s at | 4.941         | SLC16A1                    | [[SLC16A1][MCT1][monocarboxylate transporter 1][solute carrier family 16, member 1][SOLUTE CARRIER FAMILY 16 (MONOCARBOXYLIC ACID TRANSPORTER), MEMBER 1]]                                                | NM_003051 |
| 226695 at   | 4.819         | PRRX1                      | [[PRRX1][PRRX1][homeobox protein PHOX1][PAIRED-RELATED HOMEBOX GENE 1][paired related homeobox 1][paired mesoderm homeo box 1][paired mesoderm hom]]                                                      | NM_006902 |
| 206932 at   | 4.732         | CH25H                      | [[CH25H][C25H][cholesterol 25-hydroxylase]]                                                                                                                                                               | NM_003956 |
| 226702 at   | 4.61          | LOC129607                  | [[LOC129607][hypothetical protein LOC129607]]                                                                                                                                                             | XM_059368 |
| 224916 at   | 4.603         | LOC340061                  | [[LOC340061][hypothetical protein LOC340061]]                                                                                                                                                             | NM_198282 |
| 214836 x at | 4.578         | IGKC                       | [[Kml][HCAK1][IGKC1][immunoglobulin kappa constant][IMMUNOGLOBULIN IN V KAPPA-CHAIN DEFICIENCY][IMMUNOGLOBULIN KAPPA LIGHT CHAIN][immunoglobulin kappa constant]]                                         | BM993907  |
| 236489 at   | 4.542         | IGKC                       | [[Kml][HCAK1][IGKC1][immunoglobulin kappa constant][IMMUNOGLOBULIN IN V KAPPA-CHAIN DEFICIENCY][IMMUNOGLOBULIN KAPPA LIGHT CHAIN][immunoglobulin kappa constant]]                                         | CA314541  |
| 206912 at   | 4.438         | FOXE1                      | [[TFE-2][FOXE1][TFE2][TFE2][FKHL15][forkhead (Drosophila)-like 15][thyroid transcription factor-2][Forkhead, drosophila, homolog-like 15][forkhead box E1 (thyroid transc]]                               | NM_004473 |
| 202796 at   | 4.415         | SYNPO                      | [[KIAA1029][synaptopodin][SYNPO]]                                                                                                                                                                         | NM_007286 |
| 228771 at   | 4.385         | ADRBK2                     | [[GRK3][IBARK2][12.7.1.126][ADRBK2][BETA-ADRENERGIC RECEPTOR KINASE 2][adrenergic, beta, receptor kinase 2][beta adrenergic receptor kinase 2]]                                                           | NM_005160 |
| 232277 at   | 4.349         | SLC28A3                    | [[SLC28A3][CNT3][CONCENTRATIVE NUCLEOSIDE TRANSPORTER 3][solute carrier family 28 (sodium-coupled nucleoside transporter), member 3]]                                                                     | NM_022127 |
| 207386 at   | 4.323         | CYP7B1                     | [[1.14.13.1][CYP7B1][CYP7B1][oxysterol 7alpha-hydroxylase][OXYSTEROL 7-ALPHA-HYDROXYLASE][cytochrome P450, family 7, subfamily B, polypeptide 1][cytochrome P450]]                                        | NM_004820 |
| 209546 s at | 4.259         | APOL1                      | [[APOL1][APOL1][APOL1][apolipoprotein L-1][apolipoprotein L1 isoform B precursor][apolipoprotein L1 isoform A precursor]]                                                                                 | NM_145343 |
| 204885 s at | 4.254         | MSLN                       | [[CAK1][SMR1][MSLN][mesothelin][MEGAKARYOCYTE-POTENTIATING FACTOR][SOLUBLE MPF][MESOTHELIN-RELATED PROTEIN][mesothelin isoform 2 precursor][mesothelin iso]]                                              | NM_013404 |
| 202037 s at | 4.239         | SFRP1                      | [[SFRP1][IFRP-1][FrzA][SFRP1][secreted apoptosis-related protein 2][secreted frizzled-related protein 1]]                                                                                                 | NM_003012 |
| 204396 s at | 4.212         | GRK5                       | [[2.7.1.1][GRK5][GRK5][G protein-coupled receptor kinase 5]]                                                                                                                                              | NM_005308 |
| 207496 at   | 4.192         | MS4A2                      | [[IFCER1][MS4A1][MS4A2][FCER1B][Fc epsilon receptor 1 beta-chain][Fc IqE RECEPTOR, BETA CHAIN][MEMBRANE-SPANNING 4 DOMAINS, SUBFAMILY A, MEMBER 2][immunol]]                                              | NM_000139 |













|             |        |  |  |           |                                                                                                                                                                                 |           |
|-------------|--------|--|--|-----------|---------------------------------------------------------------------------------------------------------------------------------------------------------------------------------|-----------|
| 223078 s at | 0.346  |  |  | TMOD3     | [[TMOD3]] TROPOMODULIN, UBIQUITOUS [[tropomodulin 3 (ubiquitous)]]                                                                                                              | NM_014547 |
| 201397 at   | 0.343  |  |  | PHGDH     | [[PHGDH]] PHOSPHOGLYCERATE DEHYDROGENASE [[3-phosphoglycerate dehydrogenase]] phosphoglycerate dehydrogenase                                                                    | NM_006623 |
| 203946 s at | 0.334  |  |  | ARG2      | [[ARG2]] 3,5,3,1 A-III kidney arginase nonhepatic arginase L-arginine amidinohydrolase L-arginine ureahydrolase [[ARGINASE III]] arginase, type III arginase, type II precursor | NM_001172 |
| 203675 at   | 0.331  |  |  | NUCB2     | [[NUCB2]] NEFA1 nucleobindin 2                                                                                                                                                  | NM_005013 |
| 208539 x at | 0.329  |  |  | SPRR2B    | [[SPRR2B]] small proline-rich protein 2B                                                                                                                                        | NM_006945 |
| 215228 at   | 0.329  |  |  | NHLH2     | [[NSC2]] NHLH2 HEN2 NEURONAL SCL-LIKE PROTEIN 2 nescient helix loop helix 2                                                                                                     | NM_005599 |
| 209426 s at | 0.328  |  |  | AMACR     | [[AMACR]] 5,9,4 ALPHA-METHYLACYL-CoA RACEMASE AMACR DEFICIENCY [[alpha-methylacyl-CoA racemase isomerase]]                                                                      | NM_014324 |
| 227280 s at | 0.314  |  |  | FLJ40432  | [[FLJ40432]] hypothetical protein FLJ40432                                                                                                                                      | NM_153253 |
| 211922 at   | 0.302  |  |  | PKWINK1   | [[PKWINK1]] PRKWK PROTEIN KINASE, LYSINE-DEFICIENT 1 KDP PSEUDOHYPOALDOSTERONISM, TYPE I [[protein kinase, lysine deficient 1]]                                                 | NM_018979 |
| 210609 s at | 0.3    |  |  | TP53I3    | [[TP53I3]] PIG3 lipoxygenase oxidoreductase homolog p53-induced gene 3 protein [[tumor protein p53 inducible protein 3]]                                                        | NM_004881 |
| 206595 at   | 0.286  |  |  | CST6      | [[CST6]] cystatin 6 cystatin E/MICYSTATIN M/E cystatin M precursor                                                                                                              | NM_001323 |
| 155264 a a  | 0.29   |  |  | ZNF101    | [[ZNF101]] zinc finger protein 101                                                                                                                                              | NM_033204 |
| 1564307 a a | 0.286  |  |  | FLJ25179  | [[FLJ25179]] hypothetical protein FLJ25179                                                                                                                                      | NM_144670 |
| 203225 s at | 0.282  |  |  | RFK       | [[RFK]] 1149 riboflavin kinase                                                                                                                                                  | NM_018339 |
| 209160 at   | 0.281  |  |  | AKR1C3    | [[HA1753]] 1.1.1.188 DD3 HluPGFS HSD17B5 1.3.1.20 1.1.1.213 AKR1C3 KIAA0119 HAKRB HAKRE trans-1,2-dihydrobenzene-1,2-diol dehydrogenase chlordecone reductase                   | NM_003739 |
| 216594 x at | 0.281  |  |  | AKR1C1    | [[1.1.1.213]] 2-ALPHA-HSD 1.3.1.20 20-ALPHA-HSD MGCR954 H-37 HAKRC MBAB C9 DDH1 AKR1C1 trans-1,2-dihydrobenzene-1,2-diol dehydrogenase chlordecone reductase                    | NM_001353 |
| 201468 s at | 0.28   |  |  | NOO1      | [[NMOR1]] diaphorase-4 NQO1 OR1 DDT DHOU NMOR1 DIA4 DIAPHORASE 4 NAD(P)H dehydrogenase, quinone 1 diaphorase (NADH/NADPH) (cytochrome b-5 reductase)                            | NM_000903 |
| 213725 x at | 0.279  |  |  | LOC283824 | [[LOC283824]] hypothetical protein LOC283824                                                                                                                                    | BX647541  |
| 204048 s at | 0.268  |  |  | C6orf56   | [[C6orf56]] KIAA0680 KIAA0680 gene product chromosome 6 open reading frame 56                                                                                                   | NM_014721 |
| 227410 at   | 0.263  |  |  | FAM43A    | [[FAM43A]] hypothetical protein FLJ90022                                                                                                                                        | NM_153690 |
| 205637 s at | 0.26   |  |  | SH3GL3    | [[EEN-B2]] SH3D2 SH3GL3 SH3P1 Hst1 9371 CN3A3 ENDOPHILIN A3 SH3-domain GRB2-like 3 SH3 DOMAIN, GRB2-LIKE, 3                                                                     | NM_003027 |
| 204151 x at | 0.257  |  |  | AKR1C1    | [[1.1.1.213]] 2-ALPHA-HSD 1.3.1.20 20-ALPHA-HSD MGCR954 H-37 HAKRC MBAB C9 DDH1 AKR1C1 trans-1,2-dihydrobenzene-1,2-diol dehydrogenase chlordecone reductase                    | NM_001353 |
| 211653 x at | 0.256  |  |  | AKR1C2    | [[BAPB]] DD2 1.3.1.20 HBAB 1.1.1.213 HAKRD MCDR2 AKR1C2 DDH2 AKR1C-pseudo pseudo-chlordecone reductase trans-1,2-dihydrobenzene-1,2-diol dehydrogenase                          | NM_001354 |
| 1553960 at  | 0.255  |  |  | C20orf161 | [[C20orf161]] chromosome 20 open reading frame 161                                                                                                                              | NM_033421 |
| 231711 at   | 0.254  |  |  | ACPP      | [[3.1.3.2]] ACPP PAP acid phosphatase, prostate PHOSPHATASE, PROSTATE-SPECIFIC ACID prostatic acid phosphatase precursor                                                        | NM_001099 |
| 209699 x at | 0.251  |  |  | AKR1C2    | [[BAPB]] DD2 1.3.1.20 HBAB 1.1.1.213 HAKRD MCDR2 AKR1C2 DDH2 AKR1C-pseudo pseudo-chlordecone reductase trans-1,2-dihydrobenzene-1,2-diol dehydrogenase                          | NM_001354 |
| 1553929 at  | 0.251  |  |  | ASAH3     | [[ASAH3]] N-acylsphingosine amidohydrolase (alkaline ceramidase) 3                                                                                                              | NM_133492 |
| 223074 s at | 0.25   |  |  | C9orf58   | [[C9orf58]] chromosome 9 open reading frame 58                                                                                                                                  | NM_031426 |
| 210519 s at | 0.248  |  |  | NOO1      | [[NMOR1]] diaphorase-4 NQO1 OR1 DDT DHOU NMOR1 DIA4 DIAPHORASE 4 NAD(P)H dehydrogenase, quinone 1 diaphorase (NADH/NADPH) (cytochrome b-5 reductase)                            | NM_000903 |
| 205863 at   | 0.247  |  |  | S100A12   | [[MRP6]] CAEF1 ENRAGE ICGRP S100A12 CALGRANULIN-RELATED PROTEIN S100 calcium-binding protein A12 CALCIUM-BINDING PROTEIN IN AMNIOTIC FLUID EXTRACTABLE S100                     | NM_005621 |
| 243871 at   | 0.247  |  |  |           |                                                                                                                                                                                 | BG218400  |
| 213652 at   | 0.246  |  |  | PCSK5     | [[PCGA]] 3.4.21-1 PCSK5 SPC6 protease PC6 proprotein convertase PC5 subtilisin/kexin-like protease PC5 prohormone convertase 5 PROPROTEIN CONVERTASE, SUBTILISIN-LIKE 5         | NM_006200 |
| 204797 s at | 0.244  |  |  | EBH1      | [[EBH1]] EAPL EML1 HHEPAR ECHINODERM MICROTUBULE-ASSOCIATED PROTEIN-LIKE 1 ECHINODERM MICROTUBULE ASSOCIATED PROTEIN LIKE 1                                                     | NM_004434 |
| 201467 s at | 0.241  |  |  | NOO1      | [[NMOR1]] diaphorase-4 NQO1 OR1 DDT DHOU NMOR1 DIA4 DIAPHORASE 4 NAD(P)H dehydrogenase, quinone 1 diaphorase (NADH/NADPH) (cytochrome b-5 reductase)                            | NM_000903 |
| 241137 at   | 0.238  |  |  | DPCR1     | [[DPCR1]] PBL1 PANBRONCHIOLITIS, DIFFUSE diffuse panbronchiolitis critical region 1                                                                                             | NM_080870 |
| 227626 at   | 0.232  |  |  | C6orf33   | [[MPRB]] MPB1 C6orf33 MEMBRANE PROGESTIN RECEPTOR, BETA ALLOSOMAL MEMBRANE PROTEIN, BRAIN-EXPRESSED, 1 chromosome 6 open reading frame 33                                       | NM_133367 |
| 201848 s at | 0.23   |  |  | BNIP3     | [[BNIP3]] BCL2 adenovirus E1B 19kD-interacting protein 3 BCL2 adenovirus E1B 19kDa interacting protein 3 BCL2 ADENOVIRUS E1B 19-KD PROTEIN-INTERACTING PROTEIN 3                | NM_004052 |
| 226423 at   | 0.228  |  |  | C6orf33   | [[MPRB]] MPB1 C6orf33 MEMBRANE PROGESTIN RECEPTOR, BETA ALLOSOMAL MEMBRANE PROTEIN, BRAIN-EXPRESSED, 1 chromosome 6 open reading frame 33                                       | NM_133367 |
| 228810 at   | 0.227  |  |  | FLJ40432  | [[FLJ40432]] hypothetical protein FLJ40432                                                                                                                                      | NM_152523 |
| 1563894 at  | 0.218  |  |  | na        |                                                                                                                                                                                 | XM_379456 |
| 242998 at   | 0.216  |  |  | RDH12     | [[RDH12]] retinol dehydrogenase 12 (all-trans and 9-cis)                                                                                                                        | NM_152443 |
| 223075 s at | 0.215  |  |  | C9orf58   | [[C9orf58]] chromosome 9 open reading frame 58                                                                                                                                  | NM_031426 |
| 224480 s at | 0.212  |  |  | MGC11324  | [[MGC11324]] hypothetical protein MGC11324                                                                                                                                      | NM_032717 |
| 205560 at   | 0.212  |  |  | PCSK5     | [[PCGA]] 3.4.21-1 PCSK5 SPC6 protease PC6 proprotein convertase PC5 subtilisin/kexin-like protease PC5 prohormone convertase 5 PROPROTEIN CONVERTASE, SUBTILISIN-LIKE 5         | NM_006200 |
| 211538 s at | 0.211  |  |  | HSPA2     | [[HSPA1A]] heat shock-induced protein HEAT-SHOCK 70-KD PROTEIN 1A dnaK-type molecular chaperone HSP70-1 HEAT-SHOCK PROTEIN, 70-KD, 1 heat shock 70kDa protein                   | NM_056725 |
| 205964 at   | 0.209  |  |  | ZNF426    | [[ZNF426]] zinc finger protein 426                                                                                                                                              | NM_024106 |
| 238724 at   | 0.205  |  |  | BGM       |                                                                                                                                                                                 | BG030612  |
| 204059 s at | 0.204  |  |  | ME1       | [[MES1]] 1.1.40 HUMNDME ME1 pyruvic-malic carboxylase MALIC ENZYME, SOLUBLE malic enzyme, cytoplasmic NADP-dependent malic enzyme cytosolic malic enzyme                        | NM_002395 |
| 1559028 at  | 0.202  |  |  | LOC284233 |                                                                                                                                                                                 | BC037172  |
| 218843 at   | 0.2    |  |  | FNDC4     | [[FNDC4]] fibronectin type III domain containing 4                                                                                                                              | NM_022823 |
| 204393 s at | 0.199  |  |  | ACPP      | [[3.1.3.2]] ACPP PAP acid phosphatase, prostate PHOSPHATASE, PROSTATE-SPECIFIC ACID prostatic acid phosphatase precursor                                                        | NM_001099 |
| 218484 at   | 0.194  |  |  | LOC56901  | [[LOC56901]] NADH:ubiquinone oxidoreductase MLRQ subunit homolog                                                                                                                | NM_020142 |
| 220723 s at | 0.191  |  |  | FLJ21511  | [[FLJ21511]] hypothetical protein FLJ21511                                                                                                                                      | NM_025087 |
| 205559 s at | 0.19   |  |  | PCSK5     | [[PCGA]] 3.4.21-1 PCSK5 SPC6 protease PC6 proprotein convertase PC5 subtilisin/kexin-like protease PC5 prohormone convertase 5 PROPROTEIN CONVERTASE, SUBTILISIN-LIKE 5         | NM_006200 |
| 204058 at   | 0.186  |  |  | ME1       | [[MES1]] 1.1.40 HUMNDME ME1 pyruvic-malic carboxylase MALIC ENZYME, SOLUBLE malic enzyme, cytoplasmic NADP-dependent malic enzyme cytosolic malic enzyme                        | NM_002395 |
| 206448 at   | 0.173  |  |  | ZNF365    | [[ZNF365C]] ZNF365D KIAA0844 ZNF365 ITLN1 Talanin ZNF365B ZNF365 ZNF365A zinc finger protein 365 zinc finger protein 365 isoform B zinc finger protein 365 isoform C            | NM_199450 |
| 233534 at   | 0.167  |  |  | KRTAP3-2  | [[KRTAP3-2]] keratin associated protein 3-2                                                                                                                                     | NM_031959 |
| 243313 at   | 0.166  |  |  | SYNP02L   | [[SYNP02L]] synaptotagmin 2-like                                                                                                                                                | NM_024875 |
| 201849 at   | 0.166  |  |  | BNIP3     | [[BNIP3]] BCL2 adenovirus E1B 19kD-interacting protein 3 BCL2 adenovirus E1B 19-KD PROTEIN-INTERACTING PROTEIN 3                                                                | NM_004052 |
| 209283 at   | 0.158  |  |  | CRYAB     | [[CTP2]] CRYAB CRYSTALLIN, ALPHA-B CRYSTALLIN, ALPHA-B crystallin, alpha B heat-shock 20 kD like-protein CRYA2 CATARACT, POSTERIOR POLAR 2                                      | NM_001885 |
| 220724 at   | 0.154  |  |  | FLJ21511  | [[FLJ21511]] hypothetical protein FLJ21511                                                                                                                                      | NM_025087 |
| 218507 at   | 0.148  |  |  | HIG2      | [[HIG2]] hypoxia-inducible protein 2                                                                                                                                            | NM_013332 |
| 219804 at   | 0.139  |  |  | SYNP02L   | [[SYNP02L]] synaptotagmin 2-like                                                                                                                                                | NM_024875 |
| 239430 at   | 0.138  |  |  | IGFL1     | [[APRG644]] UNQ644                                                                                                                                                              | NM_198541 |
| 1557016 a a | 0.129  |  |  | FLJ40201  | [[FLJ40201]] hypothetical protein FLJ40201                                                                                                                                      | NM_152607 |
| 223720 at   | 0.128  |  |  | ECG2      | [[ECG2]] esophagus cancer-related gene-2                                                                                                                                        | NM_032566 |
| 207206 s at | 0.105  |  |  | ALOX12    | [[112(S)]] lipoxygenase 12-@LIPXYGENASE 1.13.11.31 ALOX12 LOG12 12@LO ARACHIDONATE 12-OXIDOREDUCTASE arachidonate 12-lipoxygenase                                               | NM_000697 |
| 211776 s at | 0.0956 |  |  | EPB41L3   | [[IDAL]] KIAA0987 EPB41L3 4.1B IDAL-1 NONERYTHROID PROTEIN 4.1, BRAIN TYPE liverthocyte membrane protein band 4.1-like 3 differentially expressed in adenocarcinoma             | NM_012307 |
| 244620 at   | 0.0946 |  |  | SNX19     | [[KIAA0254]] CHETB SNX19 sorting nexin 19 KIAA0254 gene product                                                                                                                 | NM_014758 |
| 206605 at   | 0.0934 |  |  | P1        | [[IPRS26]] PENDING P1 PP1 22 serine protease 26 serine protease placental protein 11 precursor                                                                                  | NM_006025 |
| 209616 s at | 0.0881 |  |  | CE54      | [[CE54]] carboxylesterase 1 (monocyte/macrophage serine esterase 1)                                                                                                             | NM_016380 |
| 212681 at   | 0.0709 |  |  | EPB41L3   | [[IDAL]] KIAA0987 EPB41L3 4.1B IDAL-1 NONERYTHROID PROTEIN 4.1, BRAIN TYPE liverthocyte membrane protein band 4.1-like 3 differentially expressed in adenocarcinoma             | NM_012307 |
| 206710 s at | 0.0687 |  |  | EPB41L3   | [[IDAL]] KIAA0987 EPB41L3 4.1B IDAL-1 NONERYTHROID PROTEIN 4.1, BRAIN TYPE liverthocyte membrane protein band 4.1-like 3 differentially expressed in adenocarcinoma             | NM_012307 |
| 214621 at   | 0.0662 |  |  | GYS2      | [[IGYS2]] 2.4.1.11 LIVER GLYCOGEN SYNTHASE GLYCOGEN SYNTHASE, LIVER glycogen synthase 2 (liver)                                                                                 | NM_021957 |
| 205627 at   | 0.0587 |  |  | CDA       | [[3.5.4.4]] CDA CDD cytidine deaminase                                                                                                                                          | NM_001785 |
| 244056 at   | 0.0555 |  |  |           |                                                                                                                                                                                 | BF514741  |
| 1558920 at  | 0.0387 |  |  |           |                                                                                                                                                                                 | AK125406  |
| 207802 at   | 0.0306 |  |  | CRISP3    | [[d442L6.3]] CRS3 CRISP-3 SGP28 Aeg2 CRISP3 cysteine-rich secretory protein-3 cysteine-rich secretory protein 3 specific granule protein (28 kDa)                               | NM_006061 |

Table SD6. Gene ontology of the genes of the cluster 1 and 2 of the CE transcript signature<sup>a</sup>

| <b>Classification</b>                                          | <b>COUNT</b> | <b>%</b> | <b>PVALUE</b> |
|----------------------------------------------------------------|--------------|----------|---------------|
| <b>Total Cluster 1</b>                                         |              |          |               |
| <b>CLASSIFIED (biological process)</b>                         | 48           | 100      |               |
| INTRACELLULAR SIGNALING CASCADE                                | 5            | 10.4     | 8.4E-02       |
| BIOSYNTHESIS                                                   | 5            | 10.4     | 1.1E-01       |
| MACROMOLECULE BIOSYNTHESIS                                     | 4            | 8.3      | 1.4E-01       |
| NEUROPEPTIDE SIGNALING PATHWAY                                 | 2            | 4.2      | 1.7E-01       |
| MUSCLE DEVELOPMENT                                             | 2            | 4.2      | 1.9E-01       |
| LIPID METABOLISM                                               | 3            | 6.3      | 2.2E-01       |
| LIPID BIOSYNTHESIS                                             | 2            | 4.2      | 2.5E-01       |
| METABOLISM                                                     | 15           | 31.3     | 3.4E-01       |
| SIGNAL TRANSDUCTION                                            | 7            | 14.6     | 3.4E-01       |
| REGULATION OF CELLULAR PROCESS                                 | 3            | 6.3      | 3.8E-01       |
| RNA PROCESSING                                                 | 2            | 4.2      | 3.9E-01       |
| NUCLEOBASE, NUCLEOSIDE, NUCLEOTIDE AND NUCLEIC ACID METABOLISM | 7            | 14.6     | 4.0E-01       |
| RNA METABOLISM                                                 | 2            | 4.2      | 4.8E-01       |
| CARBOXYLIC ACID METABOLISM                                     | 2            | 4.2      | 4.8E-01       |
| ORGANIC ACID METABOLISM                                        | 2            | 4.2      | 4.8E-01       |
| <b>CLASSIFIED (molecular function)</b>                         | 48           | 100      |               |
| PHOSPHATIDYLINOSITOL 3-KINASE ACTIVITY                         | 2            | 4.2      | 2.1E-02       |
| PHOSPHOINOSITIDE 3-KINASE ACTIVITY                             | 2            | 4.2      | 2.1E-02       |
| OXIDOREDUCTASE ACTIVITY, ACTING ON THE CH-NH GROUP             | 2            | 4.2      | 3.7E-02       |
| LIPID KINASE ACTIVITY                                          | 2            | 4.2      | 4.3E-02       |
| INOSITOL/PHOSPHATIDYLINOSITOL KINASE ACTIVITY                  | 2            | 4.2      | 5.7E-02       |
| CATALYTIC ACTIVITY                                             | 14           | 29.2     | 7.3E-02       |
| HYDROLASE ACTIVITY, ACTING ON ESTER BONDS                      | 4            | 8.3      | 8.6E-02       |
| PHOSPHOTRANSFERASE ACTIVITY, ALCOHOL GROUP AS ACCEPTOR         | 4            | 8.3      | 1.2E-01       |
| TRANSFERASE ACTIVITY                                           | 6            | 12.5     | 1.3E-01       |
| KINASE ACTIVITY                                                | 4            | 8.3      | 1.9E-01       |
| TRANSFERASE ACTIVITY                                           | 4            | 8.3      | 2.1E-01       |
| RNA BINDING                                                    | 3            | 6.3      | 2.1E-01       |
| HYDROLASE ACTIVITY                                             | 6            | 12.5     | 2.4E-01       |
| MAGNESIUM ION BINDING                                          | 2            | 4.2      | 2.4E-01       |
| NUCLEIC ACID BINDING                                           | 8            | 16.7     | 2.5E-01       |
| CAMP-DEPENDENT PROTEIN KINASE ACTIVITY                         | 2            | 4.2      | 2.8E-01       |
| STRUCTURAL CONSTITUENT OF RIBOSOME                             | 2            | 4.2      | 3.0E-01       |
| PHOSPHORIC MONOESTER HYDROLASE ACTIVITY                        | 2            | 4.2      | 3.2E-01       |
| STRUCTURAL MOLECULE ACTIVITY                                   | 3            | 6.3      | 3.6E-01       |
| PHOSPHORIC ESTER HYDROLASE ACTIVITY                            | 2            | 4.2      | 4.2E-01       |
| DNA BINDING                                                    | 5            | 10.4     | 4.2E-01       |
| PROTEIN SERINE/THREONINE KINASE ACTIVITY                       | 2            | 4.2      | 4.9E-01       |
| ELECTRON TRANSPORTER ACTIVITY                                  | 2            | 4.2      | 4.9E-01       |
| <b>Classification</b>                                          | <b>COUNT</b> | <b>%</b> | <b>PVALUE</b> |
| <b>Total Cluster 2</b>                                         |              |          |               |
| <b>CLASSIFIED (biological process)</b>                         | 40           | 100      |               |
| BIOLOGICAL_PROCESS UNKNOWN                                     | 3            | 7.5      | 0.10798584    |
| PROTEIN METABOLISM                                             | 8            | 20       | 0.13128147    |
| PROTEIN MODIFICATION                                           | 5            | 12.5     | 0.17677815    |
| PROTEIN FOLDING                                                | 2            | 5        | 0.20216705    |
| CELL GROWTH AND/OR MAINTENANCE                                 | 9            | 22.5     | 0.23926263    |
| MACROMOLECULE METABOLISM                                       | 8            | 20       | 0.27079597    |
| PROTEIN UBIQUITINATION                                         | 2            | 5        | 0.35281222    |
| CELLULAR PHYSIOLOGICAL PROCESS                                 | 9            | 22.5     | 0.39093985    |
| UBIQUITIN CYCLE                                                | 2            | 5        | 0.43916213    |
| INTRACELLULAR SIGNALING CASCADE                                | 3            | 7.5      | 0.48780127    |
| SIGNAL TRANSDUCTION                                            | 6            | 15       | 0.49792254    |
| <b>CLASSIFIED (molecular function)</b>                         | 40           | 100      |               |
| PROTEIN METHYLTRANSFERASE ACTIVITY                             | 2            | 5        | 0.02618582    |
| CYCLOPHILIN                                                    | 2            | 5        | 0.04104433    |
| CYCLOPHILIN-TYPE PEPTIDYL-PROLYL CIS-TRANS ISOMERASE ACTIVITY  | 2            | 5        | 0.04104433    |
| FK506-SENSITIVE PEPTIDYL-PROLYL CIS-TRANS ISOMERASE            | 2            | 5        | 0.04104433    |
| PEPTIDYL-PROLYL CIS-TRANS ISOMERASE ACTIVITY                   | 2            | 5        | 0.04639337    |
| CATALYTIC ACTIVITY                                             | 13           | 32.5     | 0.08352889    |
| S-ADENOSYLMETHIONINE-DEPENDENT METHYLTRANSFERASE ACTIVITY      | 2            | 5        | 0.11462364    |
| METHYLTRANSFERASE ACTIVITY                                     | 2            | 5        | 0.16651771    |
| TRANSFERASE ACTIVITY, TRANSFERRING ONE-CARBON GROUPS           | 2            | 5        | 0.16885902    |
| TRANSITION METAL ION BINDING                                   | 5            | 12.5     | 0.17813991    |
| ISOMERASE ACTIVITY                                             | 2            | 5        | 0.17931714    |
| OBSOLETE MOLECULAR FUNCTION                                    | 3            | 7.5      | 0.22712857    |
| ZINC ION BINDING                                               | 4            | 10       | 0.32123001    |
| PROTEIN BINDING                                                | 5            | 12.5     | 0.33017209    |
| UBIQUITIN-PROTEIN LIGASE ACTIVITY                              | 2            | 5        | 0.3947534     |
| MOLECULAR_FUNCTION UNKNOWN                                     | 2            | 5        | 0.44285498    |
| LIGASE ACTIVITY, FORMING CARBON-NITROGEN BONDS                 | 2            | 5        | 0.44524061    |
| ION BINDING                                                    | 5            | 12.5     | 0.45830473    |
| METAL ION BINDING                                              | 5            | 12.5     | 0.45830473    |

<sup>a</sup>The functional annotations are generated by subjecting the data to DAVID software with the GoCharts (gene ontology charts) functional algorithm. Analysis is based on biological processes and molecular functions.

Table SD7. List of the 40 genes significantly different in EE and CE compared to NL

| NL | CE | EE | Affy ID      | Fold increase in EE | Name      | Complete Name                                                                   |
|----|----|----|--------------|---------------------|-----------|---------------------------------------------------------------------------------|
|    |    |    | 232113_at    | 2.432               |           | AK095791                                                                        |
|    |    |    | 238865_at    | 2.047               | LOC132430 | XR_000195                                                                       |
|    |    |    | 226055_at    | 1.887               | ARRDC2    | NM_015683                                                                       |
|    |    |    | 227271_at    | 1.868               | FGF11     | FGF11  MGC45269  FHF3  fibroblast growth factor 11  fibroblast growth factor 11 |
|    |    |    | 215184_at    | 1.695               | DAPK2     | DRP-1  DAPK2  death-associated protein kinase 2                                 |
|    |    |    | 210542_s_at  | 1.623               | SLCO3A1   | SLC21A11  OATP-D  SLCO3A1  OATP3A1  solute carrier organic anion transport      |
|    |    |    | 203753_at    | 1.547               | TCF4      | SEF2-1B  TCF4  E2-2  ITF2  transcription factor 4  IMMUNOGLOBULIN TRANSC        |
|    |    |    | 233634_at    | 1.517               | MARVELD3  | LOC91862  MRVLDC3  MARVEL (membrane-associating) domain containing 3  s         |
|    |    |    | 239227_at    | 1.507               | EXT1      | BX115875                                                                        |
|    |    |    | 212676_at    | 1.506               | NF1       | NFNS  WSS  NF1  VRNF  Neurofibromin (neurofibromatosis, type I)  VON RECK       |
|    |    |    | 202326_at    | 1.45                | BAT8      | Em:AF134726.3  BAT8  NG36/G9a  NG36 protein  ankyrin repeat-containing pr       |
|    |    |    | 1562948_at   | 1.332               | SMC5L1    | BC035661                                                                        |
|    |    |    | 216699_s_at  | 1.28                | KLK1      | Klk6  KLKR  3.4.21.35  KLK1  KALLIKREIN, RENAL/PANCREATIC/SALIVARY  tis         |
|    |    |    | 1554430_at   | 1.263               | C21orf51  | C21orf51  chromosome 21 open reading frame 51                                   |
|    |    |    | 226212_s_at  | 1.25                | INSR      | INSR  insulin receptor  IRAN, TYPE A  DIABETES MELLITUS, INSULIN-RESISTAN       |
|    |    |    | 230941_at    | 1.225               |           | LOC400988 (LOC400988), mRNA                                                     |
|    |    |    | 213204_at    | 1.206               | PARC      | H7AP1  KIAA0708  PARC  Ubch7-associated protein 1  p53-ASSOCIATED PARK          |
|    |    |    | 1568785_a_at | 1.192               |           | BC033938                                                                        |
|    |    |    | 225037_at    | 1.145               | SLC35C2   | SLC35C2  solute carrier family 35, member C2                                    |
|    |    |    | 1559833_at   | 0.884               | ARHGEF12  | ARHGEF12  PRO2792  KIAA0382  LARG LARG/MLL FUSION GENE  leukemia-ass            |
|    |    |    | 244095_at    | 0.869               | na        | Similar to hypothetical protein 4932411E22 (LOC342600), mRNA                    |
|    |    |    | 214754_at    | 0.864               | MGC22014  | MGC22014  hypothetical protein MGC22014                                         |
|    |    |    | 237399_at    | 0.861               | MTA3      | AW594033                                                                        |
|    |    |    | 1563809_a_at | 0.851               | MCF2L     | ARHGEF14  KIAA0362  FLJ12122  MCF2L  OST  DBL's big sister  MCF2 transfor       |
|    |    |    | 216712_at    | 0.844               | SLC25A30  | LOC253512  hypothetical protein LOC253512                                       |
|    |    |    | 234658_at    | 0.843               | TARP      | AK026401                                                                        |
|    |    |    | 225812_at    | 0.842               |           | BC044912                                                                        |
|    |    |    | 239249_at    | 0.84                |           | BM723387                                                                        |
|    |    |    | 205088_at    | 0.831               | CXorf6    | CG1  CXorf6  F18 GENE  chromosome X open reading frame 6                        |
|    |    |    | 234145_at    | 0.823               | PBX3      | AK027170                                                                        |
|    |    |    | 213098_at    | 0.811               | RQCD1     | CNOT9  RQCD1  RCD1+  protein involved in sexual development  rcd1 (require      |
|    |    |    | 1556978_a_at | 0.81                | TBN       | TBN  taube nuss homolog (mouse)                                                 |
|    |    |    | 244768_at    | 0.802               | DNCH1     | DNCH1  HL-3  KIAA0325  Dnchc1  p22  DYHC  DHC1a  DNCL  DNECL  dynein            |
|    |    |    | 243382_at    | 0.793               | na        | LOC388952 (LOC388952), mRNA                                                     |
|    |    |    | 233582_at    | 0.78                | LOC115110 | AL359943                                                                        |
|    |    |    | 242774_at    | 0.779               | SYNE2     | DKFZP434H2235  Nesprin-2  SYNE2  NUANCE  SYNE-2  KIAA1011  nesprin 2            |
|    |    |    | 200638_s_at  | 0.654               | YWHAZ     | KCIP-1  14-3-3-ZETA  YWHAZ  phospholipase A2  14-3-3 zeta  BRAIN PROTEIN        |
|    |    |    | 230286_at    | 0.653               |           | BE562274                                                                        |
|    |    |    | 238780_s_at  | 0.65                |           | BM993105                                                                        |
|    |    |    | 219509_at    | 0.452               | MYOZ1     | MYOZ1  myozenin 1  CALSAARCIN 2                                                 |
